# Supplementary material for: Potential Therapeutic Targets in Obesity, Sleep Apnea, Diabetes, and Fatty Liver Disease
Source: MDPI journal article supplement (doi:10.3390/jcm13082231), 2024-04-12

## Supplementary Materials

**Figure S1: An overview of the proposed mechanisms underlying MASLD, OSA, and T2DM and some of the current therapies that target these associations**

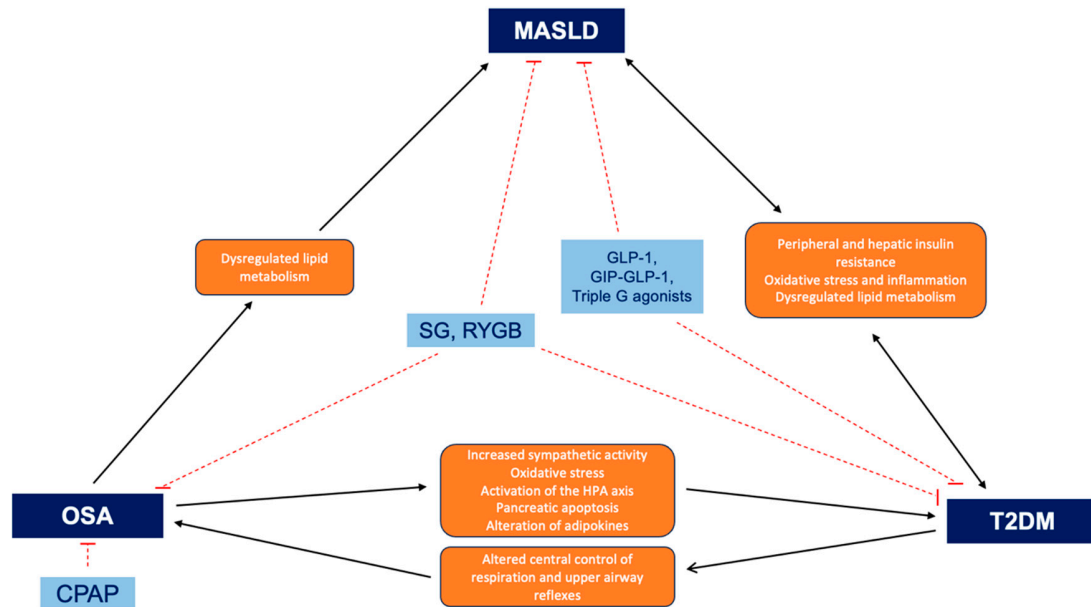

**Figure S2: An overview of GIP-GLP-1 effects on glucose and satiety**

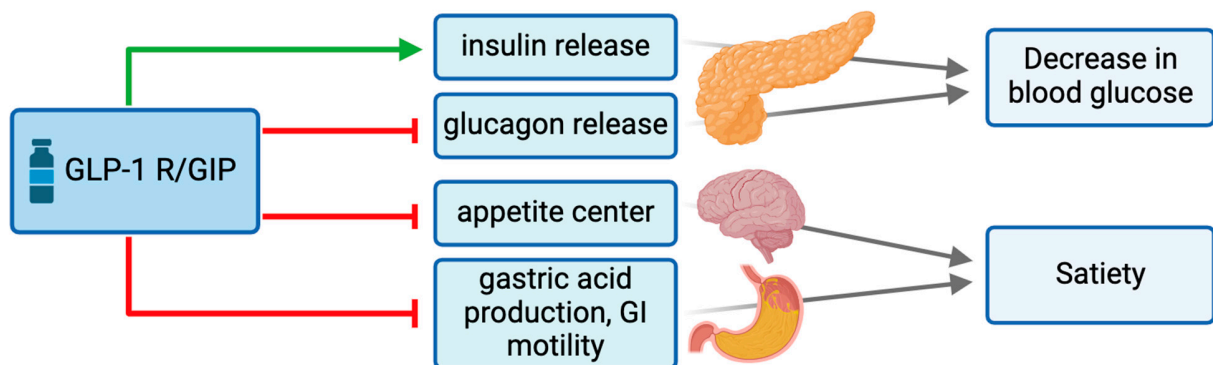

Supplement: s1 [file s1]
